# Supplementary material for: Base editing correction of hypertrophic cardiomyopathy in human cardiomyocytes and humanized mice
Source: Springer Nature journal article supplement (doi:10.1038/s41591-022-02176-5), 2023-02-01
Supplement: 41591_2022_2176_MOESM1_ESM.pdf [file 41591_2022_2176_MOESM1_ESM.pdf]

---

# Base editing correction of hypertrophic cardiomyopathy in human cardiomyocytes and humanized mice

---

In the format provided by the authors and unedited

---

## Supplementary Note 1.

AAV9-cTnT-ABEmax-VRQR-h403 N-terminal half

AAV ITR

Cardiac Troponin T promoter

Nuclear Localization Signals (Bipartite NLS)

ABEmax

Linkers

SpCas9-VRQR N-terminal half

Npu N-terminal fragment

WPRES-3 (Woodchuck Hepatitis Virus Posttranscriptional Regulatory Element-3)

bGH poly(A) signal (bovine growth hormone polyadenylation signal)

hU6 promoter-sgRNA scaffold

h403\_sgRNA

Highlighted Text (Nuclear localization signals, ABEmax, Linkers, SpCas9-VRQR, Npu N-terminal fragment) encode expressed proteins.

ctgcgcgctcgtcgtcactgagccgcccgggcaaagcccgggctcgggacgttggcgcggcctcagtgagcagcgag  
cgcgcagagagggagtgcccaactccatcactaggggtctTGTAGTTAATGATTAACCCGCCATGCTACT  
TATCTACGTAGCCATGCTCTAGATTAATTAAGAGGTCGGGATAAAAGCAGTCTGGGC  
TTTCACATGACAGCATCTGGGGCTGCGGCAGAGGGTCGGGTCCGAAGCGCTGCCTTA  
TCAGCGTCCCAGCCCTGGGAGGTGACAGCTGGCTGGCTTGTGTTCAGCCCCCTCGGGC  
ACTCACGTATCTCCGTCCGACGGGTTTAAAATAGCAAACTCTGAGGCCACACAATA  
GCTTGGGCTTATATGGGCTCCTGTGGGGGAAGGGGAGCACGGAGGGGGCCGGGGC  
CGCTGCTGCCAAAATAGCAGCTCACAAGTGTTCATTCTCTGGGCGCCGGGCAC  
ATTCCTGCTGGCTCTGCCCGCCCCGGGGTGGGCGCCGGGGGACCTTAAAGCCTCTG  
CCCCCAAGGAGCCCTTCCCAGACAGCCGCGGCACCCACCGCTCCGTGGGAaccggtg  
ccaccatgaaacggacagccgacggaagcaggttcgagtcaccaagaagaagcggaaagtcttgaagtcgagtttagccacagat  
tggatgagcagcactgacctggcaaagcagcatggatgaaagagaagtccccgtggcgccgtgctgtgcaacaatagag  
tgatcggagagggatggaacaggccaatcgccgccacgacctaccgacacgcagagatcatggcactgagcagggaggcctgg  
tcatgcagaattaccgctgatgatccacctgtatgtgacactggagccatgcgtgatgtgcgagagcaatgatccacagcaggat  
cggaagagtgggttcggagcacgggacgccaagaccggcgagcaggctccctgatggatgtgctgcaccacccggcatgaaccac  
cgggtggagatcacagaggaatcctggcagacagtgccgcccctgctgagcgatttcttagaatcggagacaggagatcaaggc  
ccagaagaaggcacagagctccaccgactctggaggatcagcggaggatcctctggaagcagacaccaggcacaagcagatccgc  
cacaccagagagctccggcgctcctccggaggatcctctgagtgaggatcttccacagactgagatgacatgacctgacctggc  
caagagggcacgcgatgagagggaggtgctgtgggagccgtgctggtgctgaacaatagagtgatcggcgagggctggaacagagc  
catggcctgcagaccaacagccatgccgaaattatggcctgagacagggcggcctggtcatgcagaactacagactgattgacgc  
cacctgtacgtgacattcagccttgcgtgatgtgcgccggcgcctgatccactctaggatcggccgctggtgtttggcgtgaggaac  
gcaaaaaccggcgccgaggtccctgatggactgctgactacccggcatgaatcaccgcgtcgaattaccgagggatcctggc  
agatgaatgtgccccctgctgtgctatttcttggatgctagacaggtgtcaatgctcagaagaaggccagagctccaccgactccg  
gaggatctagcggaggctcctctggtctgagacacctggcacaagcagagcgaacacctgaaagcagcggggcagcagcggg  
ggtcagacaagaagtacagcatcggcctggccatcggccaactctgtgggctgggcccgtgatcaccgacgagtaacaaggtcccagc  
aagaaattcaaggtgctgggcaacaccgaccggcacagatcaagaagaacctgatcggagccctgctgttcgacagcggcgaaacag  
ccgagggccaccggctgaagagaaccgccagaagaatataccagacggaagaaccggtatctctatctgcaagagatctttagca  
cgagatggccaaggtggacgacagcttctccagactggaagagtccttctggtggaagaggataagaagcagcagcggcacccca  
tcttcggcaacatcgtggacgaggtggcctaccacgagaagtacccaccatctaccactgagaaagaactgttgacagcaccgac

aaggccgacctgaggctgatctatctggccctggcccacatgatcaagttccggggccacttctgatcgagggcgacctgaaccccgac  
aacagcgacgtggacaagctgttcatccagctggtgcagacctacaaccagctgttcgaggaaaaccccatcaacgccagcggcgtgga  
cgccaaggccatctgtctgccagactgagcaagagcagacggctggaaaatctgatcgcccagctgccggcgagaagaagaatggc  
ctgttcggaaacctgattgccctgagcctgggctgacccccaaactcaagagcaacttcgacctggccgaggatgcaaaactgcagctga  
gcaaggacacctacgacgacgacctggacaacctgctggcccagatcgccgaccagtacgccgacctgttctggccgcaagaacctg  
tccgacgccatcctgctgagcgacatcctgagagtgaaccaggagatcaccaaggccccctgagcgcctctatgatcaagagatcgac  
gagcaccaccaggacctgacctgctgaaagctctctgctggcagcagctgctgagaagtacaaagagattttctgaccagagcaag  
aacggctacgccggctacattgacggcggagccagccaggaagagttctacaagttcatcaagccatctggaaaagatggacggcac  
cgaggaaactgctctgaagctgaacagagaggacctgctgcggaagcagcggaccttcgacaacggcagcatccccaccagatccac  
ctgggagagctgacgccattctgcccggcaggaagattttaccattctgaaggacaaccgggaaaagatcgagaagatcctgacc  
ttccgcatcccactactagctggccctctggccaggggaaacagcagattcgctggatgaccagaaaagcggaggaaccatcacc  
ctggaacttcgaggaagtggggacaagggcgttccgccagagcttcatcgagcggatgaccaacttcgataagaacctgccaacga  
gaagtgctgccaagcacagcctgctgtacgagtacttcaccgtgtataacgagctgaccaaagtgaatacgtgaccgagggagatgag  
aaagcccgcctctgagcggcagcagaaaaagccatctggacctgctgtcaagaccaaccggaaagtgacctggaagcagctga  
aagaggactactcaagaaaatcgagtgcctgtcctacgagacagagatcctgacagtggagtatggcctgctgccaatcggaagatcgt  
ggagaagagatcgagtgtacctgtactctgtggataacaatggcaacatctatacacagcccgtggcacagtggcacgataggggaga  
gcaggaggtgttcgagtattgctggaggacggcagcctgatcagggcaaccaaggaccacaagttcatgacagtggatggccagatgc  
tgcctatcgacgagatttctgagcgggagctggacctgatgagagtggataactgcctaataagcggaggcagtaaaagaacagcagac  
gggagtgagttgagcccaagaaaaagagaaaggtgtaagatctgataatcaacctctggattacaaaatttgaagattgactggtattct  
taactatgttctcttttacgctatgtggatacgtgctttaatgccttctgtatcatgctattgctcccgtatggcttctctctctctgtataa  
atcctggttagttcttggccacggcggaaactcatcgccgctgcttggccgctgctggacaggggctcggtgttgggactgacaattccg  
tgggtcgactgtgccttctagtgtccagccatctgttfttcccctccccgtgccttctgacctggaaggtgccactcccactgctcttc  
ctaataaaatgaggaattgcatcgcatgtctgagttaggtgtcattctattctggggggtggggtggggcaggacgaagggggagatt  
gggaagacaatagcagcagctgctgggatcggtgggctctatggcggccGAGGGCCTATTTCCCATGATTCT  
TCATATTTGCATATACGATACAAGGCTGTTAGAGAGATAATTAGAATTAATTTGACT  
GTAAACACAAAGATATTAGTACAAAATACGTGACGTAGAAAGTAATAATTTCTTGG  
GTAGTTTGCAGTTTTAAAATTATGTTTTAAAATGGACTATCATATGCTTACCGTAACT  
TGAAAGTATTTTCGATTTCTTGGCTTTATATATCTTGTGGAAAGGACGAAACACCGcctc  
aggtgaaagtgggcaaGCTTAAGAGCTATGCTGGAAACAGCATAGCAAGTTTAAGTAAGGCT  
AGTCCGTTATCAACTTGAAAAAGTGGCACCGAGTCGGTGCTTTTTTTTTCGGCCGCTC  
TAGAGCATGGCTACGTAGATAAGTAGCATGGCGGGTTAATCATTAACTACAaggaacc  
ctagtgatggagttggccactcctctctgcgctcgtcgtcactgagggcggggcgaccaaaggtcgcccgacgcccgggcttggc  
cgggcggcctcagtgagcagcgagcgcgag

AAV9-cTnT-ABEmax-VRQR-h403 C-terminal half

AAV ITR

Cardiac Troponin T promoter

Nuclear Localization Signals (Bipartite NLS)

Npu C-terminal fragment

Linkers

SpCas9-VRQR C-terminal half

WPRE-3 (Woodchuck Hepatitis Virus Posttranscriptional Regulatory Element-3)

bGH poly(A) signal (bovine growth hormone polyadenylation signal)

hU6 promoter-sgRNA scaffold

h403\_sgRNA

Highlighted Text (Nuclear localization signals, ABEmax, Linkers, SpCas9-VRQR, Npu C-terminal fragment) encode expressed proteins.

ctgcgcgctcgtcgtcactgaggccgcccgggcaaagcccgggctcgggacaccttggctgccccggcctcagtgagcgagcgag  
cgcgagagagggagtggccaactccatcactaggggttctTGTAGTTAATGATTAACCCGCCATGCTACT  
TATCTACGTAGCCATGCTCTAGATTAATTAAGAGGTTCGGGATAAAAGCAGTCTGGGC  
TTTCACATGACAGCATCTGGGGCTGCGGCAGAGGGTTCGGGTCCGAAGCGCTGCCTTA  
TCAGCGTCCCCAGCCCTGGGAGGTGACAGCTGGCTGGCTTGTGTCAGCCCCCTCGGGC  
ACTCAGTATCTCCGTCCGACGGGTTTAAATAGCAAACTCTGAGGCCACACAATA  
GCTTGGGCTTATATGGGCTCCTGTGGGGGAAGGGGGAGCACGGAGGGGGCCGGGGC  
CGCTGCTGCCAAAATAGCAGCTCACAAGTGTTCATTCTCTCTGGGCGCCGGGGCAC  
ATTCTGCTGGCTCTGCCCGCCCCGGGGTGGGCGCCGGGGGGACCTTAAAGCCTCTG  
CCCCCAAGGAGCCCTTCCAGACAGCCGCCGCCACCCACCGCTCCGTGGGAaccggtg  
ccaccatgaaacggacagccgacggaagcgagttcagtcaccaagaagaagcggaagtcacaaagattgctacacggaatacctg  
ggaaagcagaacgtgtacgacatcggcgtggagcgggatcacaactcgcctgaagaatggctttatcgccagcaattgcttcgactccg  
tgaaatcctcggcgtggaagatcgggtcaacgcctcctgggcacataccacgatctgctgaaaattatcaaggacaaggacttctggac  
aatgaggaaaacgaggacattctggaagatcgtgctgacctgacactgttggagacagagagatgacgaggaacggctgaaaacc  
tatgcccactgttcgacgacaaagtgatgaagcagctgaagcggcggagatacaccggctggggcaggctgagccggaagctgatca  
acggcatccgggacaagcagtcggcaagacaatcctggattcctgaagtccgacggctcgccaacagaacttcacgactgatcca  
cgacgacagcctgaccttaagaggacatccagaagcccagggtcggccaggggcgatgctgacgagcagcattgccaatctgg  
ccggcagccccgccattaagaagggcatctgcagacagtgaaggtggaggacgagctcgtgaaagtgatggcgccgcaagcccga  
gaacatcgtgatcgaatggccagagagaaccagaccaccagaagggacagaagaacagccgcgagagaatgaagcggatcgaag  
agggcatcaaagagctgggcagccagatctgaaagaacccccgtggaaacaccagctgcagaacgagaagctgtacctgtactac  
ctgcagaatggcgggatgtgactgtggaccaggaactggacatcaaccggctgtccgactacgatgtggaccatatctgcctcagagct  
ttctgaaggacgactccatcgataacaaggtgctgaccagaagcgacaagaaccggggcaagagcgacaacgtgcctccgaagaggt  
cgtgaagaagatgaagaactactggcggcagctgctgaacgccaagctgattaccagagaaagttcgacaatctgaccaaggccgaga  
gaggcggcctgagcgaactgataagccggcttcatcaagagacagctggtggaaacccggcagatcacaagcagctggcacagat  
cctggactccggatgaacactaagtacgacgagaatgacaagctgatccgggaagtgaagtgatcacctgaagtccaagctggtgct  
cgattccggaaggatttccagtttacaaagtgcgcgagatcaacaactaccaccacgccacgacgcctacctgaacgccgtcgtggga  
accgacctgatcaaaaagtaccctaaagctggaagcaggtcgtgacggcgactacaaggtgtacgacgtgcggaagatgacccaag  
agcgagcaggaatcggcaaggctaccgcaagcttcttacagcaacatcatgaacttttcaagaccgagattaccctggccaacgg  
cgagatccggaagcggcctctgatcagacaaacggcgaaaccggggagatcgtgtgggataaggccgggatttggaccgtgagg  
aaagtgtgagcatgccccagtgatgataagaccgaggtgcagacaggcggcttcagaaagagcttatctgccaagag  
gaacagcgataagctgatcggcagaagaaggactggaccctaagaagtacggcggttcgtgagccccaccgtggcctattctgtgct  
ggtggtggcceaagtggaaaaggcgaagtccaagaaactgaagagtgtgaaagagctgctgggatccatcatggaagaagcagc  
ttcgagaagaatccatcgactttctggaagccaagggtacaaagaagtgaaaaaggacctgatcatcaagctgcctaagctactcctgtt  
cgagctggaaacggcggagagaatgctggcctcagccagagaactgcagaagggaacgaactggcctgcctccaaatagt  
aactcctgtacctggccagccactatgagaagctgaagggtcccccgaggataatgagcagaacagctgtttgtggaacagcacaag  
cactacctggacgagatcatcagcagatcagcgagttctccaagagagtgatcctggccgacgctaacttgacaaaagtgtgctccgct  
acaacaagcaccgggataagccatcagagagcaggccgagaatcatccacctgttaccctgaccaatctgggagccccctgccgct  
tcaagtactttgacaccaccatcagccggaagcagctacagaagcaccaaagaggtgctggacgccacctgatccaccagagcatcacc  
ggcctgtacgagacaggtatgacctgtctcagctgggaggtgactctggcggctcaaaaagaaccggcagcgagcaattcgagcc  
caagaagaagaggaaaagctaaagatctgataatcaacctctggattacaaaattgtgaaagattgactggattcttaactatgttgcctttta  
cgctatgtggatagctgctttaatgctttgtatcatgctattgcttcccgtatggctttcatttctcctctgtataaatcctggttagtttggc  
acggcggaaactcatcgccgctgcttggccgctgctggacaggggctcggctgttgggactgacaattccgtggctgagctgtgccttc  
tagttgccagccatctgttgtttgccccctccccgtgcttccctgacctggaagtgccactcccactgtccttcttaataaatgaggaaat

tgcatcgattgtctgagtaggtgtcattctattctggggggtgggggtggggcaggacagcaagggggaggattgggaagacaatagcag  
gcatgctggggatgcggtgggctctatggctcgaGAGGGCCTATTTCCCATGATTCCTTCATATTTGCAT  
ATACGATACAAGGCTGTTAGAGAGATAATTAGAATTAATTTGACTGTAAACACAAA  
GATATTAGTACAAAATACGTGACGTAGAAAAGTAATAATTTCTTGGGTAGTTTGCAGT  
TTTAAAATTATGTTTTAAAATGGACTATCATATGCTTACCGTAACTTGAAAGTATTC  
GATTTCTTGGCTTTATATATCTTGTGGAAAGGACGAAACACCGcctcaggtgaaagtgggcaaG  
CTTAAGAGCTATGCTGGAAACAGCATAGCAAGTTTAAGTAAGGCTAGTCCGTTATCA  
ACTTGAAAAAGTGGCACCGAGTCGGTGCTTTTTTTGCGGCCGCTCTAGAGCATGGCT  
ACGTAGATAAGTAGCATGGCGGGTTAATCATTAACTACAaggaaccctagtgatggagttggccac  
tcctctctgcgcgctcgctcgctcactgaggccgggagaccaaaggtcgcccagcccgggctttgcccgggaggcctcagtgagcg  
agcgagcgcgag

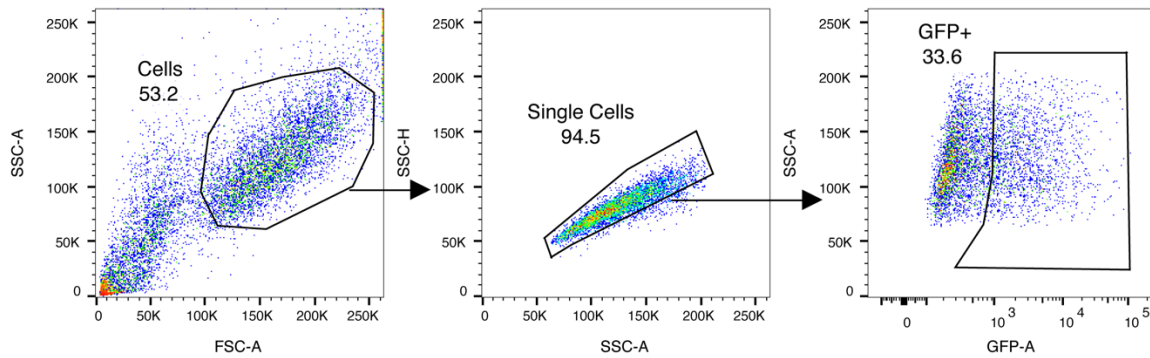

**Supplementary Figure 1. Representative flow cytometry gating strategy for GFP+ iPSCs.**

For generation of isogenic iPSCs containing the *MYH7* c.1208 G>A (p.R403Q) mutation via homology-directed repair, and for base editing correction of the *MYH7* c.1208 G>A (p.R403Q) mutation, iPSCs were nucleofected with a single plasmid encoding Cas9 nuclease or an adenine base editor linked to GFP via a 2A self-cleaving peptide, and the sgRNA of interest. Cells that were successfully nucleofected with the gene editing components express GFP, and single GFP+ iPSCs were collected.

Whole heart  
homogenate control

↓

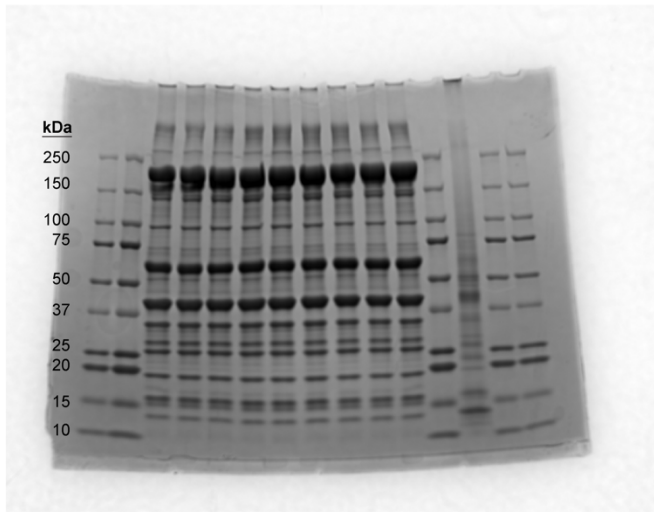

**Supplementary Figure 2. Uncut gels.** Full unedited gel for Extended Data Fig 6. Molecular weights for ladder markings are in kDa.

**Supplementary Table 1. Summary of oligos**

| Oligo Name                                        | Oligo Sequence                                                                                                                            |
|---------------------------------------------------|-------------------------------------------------------------------------------------------------------------------------------------------|
| sgRNA for HDR Knock-In of MYH7 R403Q              | TCATTGCCCACTTTCACCCG                                                                                                                      |
| ssODN for HDR Knock-In of MYH7 R403Q              | TGCTACTTGCCTTTTCCTTCCAGAGGCTGACAAGTCTGCCTACCTC<br>ATGGGGCTGAACTCAGCCGACCTGCTCAAGGGGCTGTGCCACCCT<br>CAGGTGAAAGTGGGCAATGAGTACGTACCAAGGGGCAG |
| Sequencing for hMYH7 F                            | ACCTCCACATCCTGGGTCAA                                                                                                                      |
| Sequencing for hMYH7 R                            | GTGGAGGAGAGACCCATATT                                                                                                                      |
| Sequencing for hMYH6 F                            | GGAGGCTGTAGTGAGCCAAG                                                                                                                      |
| Sequencing for hMYH6 R                            | AGGAGCAAGCGAGTGATTGT                                                                                                                      |
| h403_sgRNA                                        | CCGCAGGTGAAAGTGGGCAA                                                                                                                      |
| HTS ON-Target F                                   | TCGTCGGCAGCGTCAGATGTGTATAAGAGACAGTCCTCTCATACA<br>CTGCCTTGG                                                                                |
| HTS ON-Target R                                   | GTCTCGTGGGCTCGGAGATGTGTATAAGAGACAGCACCATGCCTG<br>GCTAATTTT                                                                                |
| HTS OFF1 F                                        | TCGTCGGCAGCGTCAGATGTGTATAAGAGACAGGGGACAATGAC<br>TGCCTCTGT                                                                                 |
| HTS OFF1 R                                        | GTCTCGTGGGCTCGGAGATGTGTATAAGAGACAGTACCTCATGGG<br>GCTGAACTC                                                                                |
| HTS OFF2 F                                        | TCGTCGGCAGCGTCAGATGTGTATAAGAGACAGCAGGTCTCGATT<br>CCAAGGAG                                                                                 |
| HTS OFF2 R                                        | GTCTCGTGGGCTCGGAGATGTGTATAAGAGACAGGCACAACCCA<br>CAAGTTTGTTT                                                                               |
| HTS OFF3 F                                        | TCGTCGGCAGCGTCAGATGTGTATAAGAGACAGTTTTCAAATAT<br>TCCTGCTCACT                                                                               |
| HTS OFF3 R                                        | GTCTCGTGGGCTCGGAGATGTGTATAAGAGACAGAGGCACCTTTC<br>TGTGTGCTT                                                                                |
| HTS OFF4 F                                        | TCGTCGGCAGCGTCAGATGTGTATAAGAGACAGATTCTGGATGCA<br>GGATTTGC                                                                                 |
| HTS OFF4 R                                        | GTCTCGTGGGCTCGGAGATGTGTATAAGAGACAGGTGGACAACA<br>GGCCACTCTT                                                                                |
| HTS OFF5 F                                        | TCGTCGGCAGCGTCAGATGTGTATAAGAGACAGGGACAATTTGT<br>ATTTTAGCTTATTTTC                                                                          |
| HTS OFF5 R                                        | GTCTCGTGGGCTCGGAGATGTGTATAAGAGACAGTCCCCTGCTTT<br>TCTCTGTGT                                                                                |
| HTS OFF6 F                                        | TCGTCGGCAGCGTCAGATGTGTATAAGAGACAGTGATCCTGAAG<br>ATTAGTGGATGC                                                                              |
| HTS OFF6 R                                        | GTCTCGTGGGCTCGGAGATGTGTATAAGAGACAGCCATCCTGAG<br>ATAATCCTCCA                                                                               |
| HTS OFF7 F                                        | TCGTCGGCAGCGTCAGATGTGTATAAGAGACAGACCTAGGAGGC<br>TGGGATTGT                                                                                 |
| HTS OFF7 R                                        | GTCTCGTGGGCTCGGAGATGTGTATAAGAGACAGCATGACAAGG<br>AGTCCGAGGT                                                                                |
| HTS OFF8 F                                        | TCGTCGGCAGCGTCAGATGTGTATAAGAGACAGGCCCTGGTTAC<br>AGCATAAG                                                                                  |
| HTS OFF8 R                                        | GTCTCGTGGGCTCGGAGATGTGTATAAGAGACAGCCACAACCAC<br>TGACTGACTGA                                                                               |
| sgRNA for Knock-In of MYH7 R403Q into murine Myh6 | TCGTTCCCCACCTTTCACCCG                                                                                                                     |



|                                                   |                                                                                                                                                                                                     |
|---------------------------------------------------|-----------------------------------------------------------------------------------------------------------------------------------------------------------------------------------------------------|
| ssODN for Knock-In of MYH7 R403Q into murine Myh6 | TGGGACAAAGGAATGGAGGTACTGAAAATGCTTCCCCTCCTTG<br>TCTATCAGATGCTGACAAATCAGCCTACCTCATGGGGCTGAACTC<br>AGCCGACCTGCTCAAGGGGCTGTGCCACCCTCAGGTGAAAGTGG<br>GCAATGAGTACGTCACCAAGGGGCAGAGTGTACAGCAAGTGTAC<br>TAT |
| Genotyping for Myh6 F                             | GAGAAGCAGTGGTCATCATC                                                                                                                                                                                |
| Genotyping for Myh6 R                             | GTGAGAAACACGTGGTGTCC                                                                                                                                                                                |
| HTS Myh6 On-Target F                              | TCGTCCGCAGCGTCAGATGTGTATAAGAGACAGGGATCAAGGAC<br>ATGGCAAAT                                                                                                                                           |
| HTS Myh6 On-Target R                              | GTCTCGTGGGCTCGGAGATGTGTATAAGAGACAGGCTTGGTCTCC<br>AGGGTTG                                                                                                                                            |
| HTS Myh6 cDNA On-Target F                         | TCGTCCGCAGCGTCAGATGTGTATAAGAGACAGGATGGCACAGA<br>AGATGCTGA                                                                                                                                           |
| HTS Myh6 cDNA On-Target R                         | GTCTCGTGGGCTCGGAGATGTGTATAAGAGACAGCGAACATGTG<br>GTGGTTGAAG                                                                                                                                          |
| Sanger Myh6 cDNA On-Target F                      | GCTCTTGGCCACTGATAGTGC                                                                                                                                                                               |
| Sanger Myh6 cDNA On-Target R                      | GCTCAAAGCTGTTGAAATCG                                                                                                                                                                                |
| VCN N terminal AAV half F                         | ACCAGAAAGAGCGAGGAAAC                                                                                                                                                                                |
| VCN N terminal AAV half R                         | TCGTTGGGCAGGTTCCTTATC                                                                                                                                                                               |
| VCN N terminal AAV Probe                          | /56-FAM/TTGGTCATC/ZEN/CGCTCGATGAAGCTC/3IABkFQ/                                                                                                                                                      |
| VCN C terminal AAV half F                         | CCCAAGAGGAACAGCGATAAG                                                                                                                                                                               |
| VCN C terminal AAV half R                         | CCACCACCAGCACAGAATAG                                                                                                                                                                                |
| VCN C terminal AAV Probe                          | /56-FAM/ATCGCCAGA/ZEN/AAGAAGGACTGGGAC/3IABkFQ/                                                                                                                                                      |
